# Supplementary material for: Risk and Protective Factors in the COVID-19 Pandemic: A Rapid Evidence Map
Source: Front Public Health. 2020 Nov 24;8:582205. doi: 10.3389/fpubh.2020.582205 (PMC7732416; doi:10.3389/fpubh.2020.582205)
Supplement: Supplementary file 3 [file Data_Sheet_3.xlsx]

## Sheet: COVID-19 rEM 
Supplementary Data Sheet 3
RefID	Title	Year	Behavioral Susceptibility Category	Physiological Susceptibility Category	Demographic Susceptibility Category	Environmental Susceptibility Category	Pre-Print	Peer Reviewed	DOI or Reference Information	Pre-Print is Now a Peer Reviewed Publication
s1	Potential association between COVID-19 mortality and health-care resource availability	2020				Social Factors|Infrastructure		x	https://doi.org/10.1016/S2214-109X(20)30068-1	n/a
s10	Early epidemiological analysis of the coronavirus disease 2019 outbreak based on crowdsourced data: a population-level observational study	2020			Age			x	https://doi.org/10.1016/S2589-7500(20)30026-1	n/a
s100	Age-dependent effects in the transmission and control of COVID-19 epidemics	2020		Underlying Health Conditions	Socioeconomic|Age	Social Factors	x		https://doi.org/10.1101/2020.03.24.20043018	https://doi.org/10.1038/s41591-020-0962-9
s101	Correlation between universal BCG vaccination policy and reduced morbidity and mortality for COVID-19: an epidemiological study	2020	Vaccinations				x		https://doi.org/10.1101/2020.03.24.20042937
s102	Modes of contact and risk of transmission in COVID-19 among close contacts	2020			Age	Social Factors	x		https://doi.org/10.1101/2020.03.24.20042606
s103	Disparities in Age-Specific Morbidity and Mortality from SARS-CoV-2 in China and the Republic of Korea	2020			Age|Gender			x	https://doi.org/10.1093/cid/ciaa354	n/a
s104	Acute kidney injury at early stage as a negative prognostic indicator of patients with COVID-19: a hospital-based retrospective analysis	2020		Underlying Health Conditions	Gender|Age		x		https://doi.org/10.1101/2020.03.24.20042408
s105	Comorbid Diabetes Mellitus was Associated with Poorer Prognosis in Patients with COVID-19: A Retrospective Cohort Study	2020		High Blood Sugar|Underlying Health Conditions			x		https://doi.org/10.1101/2020.03.24.20042358
s107	A New Predictor of Disease Severity in Patients with COVID-19 in Wuhan, China	2020			Age		x		https://doi.org/10.1101/2020.03.24.20042119
s108	History of Coronary Heart Disease Increases the Mortality Rate of Coronavirus Disease 2019 (COVID-19) Patients: A Nested Case-Control Study Based on Publicly Reported Confirmed Cases in Mainland China	2020		High Blood Pressure|Underlying Health Conditions			x		https://doi.org/10.1101/2020.03.23.20041848	Now accepted for publication in BMJ Open
s109	Radiographic Findings and other Predictors in Adults with Covid-19	2020			Age		x		https://doi.org/10.1101/2020.03.23.20041673
s11	Patients with respiratory symptoms are at greater risk of COVID-19 transmission	2020		Underlying Health Conditions				x	https://doi.org/10.1016/j.rmed.2020.105935	n/a
s111	Clinical Characteristics of Hospitalized Patients with SARS-CoV-2 and Hepatitis B virus Co-infection	2020		Underlying Health Conditions			x		https://doi.org/10.1101/2020.03.23.20040733	https://doi.org/10.1007/s12250-020-00276-5
s112	Climate affects global patterns of COVID-19 early outbreak dynamics	2020				Weather	x		https://doi.org/10.1101/2020.03.23.20040501
s113	Hypertension and Diabetes Delay the Viral Clearance in COVID-19 Patients	2020		High Blood Pressure|Underlying Health Conditions	Gender|Age		x		https://doi.org/10.1101/2020.03.22.20040774
s114	The impact of temperature and absolute humidity on the coronavirus disease 2019 (COVID-19) outbreak - evidence from China	2020				Weather	x		https://doi.org/10.1101/2020.03.22.20038919
s115	Epidemiological and clinical characteristics of COVID-19 in Shenzhen, the largest migrant city of China	2020			Age		x		https://doi.org/10.1101/2020.03.22.20035246
s116	Prognostic value of C-reactive protein in patients with COVID-19	2020		Underlying Health Conditions	Gender|Age		x		https://doi.org/10.1101/2020.03.21.20040360	https://doi.org/10.1093/cid/ciaa641
s117	ACE2 Expression is Increased in the Lungs of Patients with Comorbidities Associated with Severe COVID-19	2020		Genetic|Underlying Health Conditions			x		https://doi.org/10.1101/2020.03.21.20040261	https://doi.org/10.1093/infdis/jiaa332
s118	Clinical characteristics and reasons of different duration from onset to release from quarantine for patients with COVID-19 Outside Hubei province, China.	2020			Age	Social Factors	x		https://doi.org/10.1101/2020.03.21.20038778
s119	A Multicentre Study of 2019 Novel Coronavirus Disease Outcomes of Cancer Patients in Wuhan, China	2020		Underlying Health Conditions	Age		x		https://doi.org/10.1101/2020.03.21.20037127
s120	Potential Factors for Prediction of Disease Severity of COVID-19 Patients	2020		Underlying Health Conditions	Age		x		https://doi.org/10.1101/2020.03.20.20039818
s121	Anti-hypertensive Angiotensin II receptor blockers associated to mitigation of disease severity in elderly COVID-19 patients	2020	Medication	High Blood Pressure|Underlying Health Conditions	Age		x		https://doi.org/10.1101/2020.03.20.20039586
s122	COVID-19: Modelling Local Transmission and Morbidity effects to provide an estimate of overall Relative Healthcare Resource Impact by General Practice Granularity	2020			Socioeconomic|Age	Infrastructure	x		https://doi.org/10.1101/2020.03.20.20039024
s123	High COVID-19 incidence among Norwegian travellers returned from Lombardy: implications for travel restrictions	2020				Social Factors	x		https://doi.org/10.1101/2020.03.20.20038406
s124	Role of meteorological temperature and relative humidity in the January-February 2020 propagation of 2019-nCoV in Wuhan, China	2020				Weather	x		https://doi.org/10.1101/2020.03.19.20039164
s125	Age profile of susceptibility, mixing, and social distancing shape the dynamics of the novel coronavirus disease 2019 outbreak in China	2020			Age	Social Factors	x		https://doi.org/10.1101/2020.03.19.20039107
s126	Climatic influences on the worldwide spread of SARS-CoV-2	2020				Weather	x		https://doi.org/10.1101/2020.03.19.20038158
s127	COVID-19 Myocarditis and Severity Factors? An Adult Cohort Study	2020			Age		x		https://doi.org/10.1101/2020.03.19.20034124
s128	Characteristics of patients with COVID-19 during epidemic ongoing outbreak in Wuhan, China	2020		Underlying Health Conditions	Gender|Age		x		https://doi.org/10.1101/2020.03.19.20033175
s129	Identification of a super-spreading chain of transmission associated with COVID-19	2020		Underlying Health Conditions		Social Factors	x		https://doi.org/10.1101/2020.03.19.20026245
s13	Is COVID-19 receiving ADE from other coronaviruses?	2020						x	https://doi.org/10.1016/j.micinf.2020.02.006	n/a
s130	ACE-2 Expression in the Small Airway Epithelia of Smokers and COPD Patients: Implications for COVID-19	2020	Addiction	Underlying Health Conditions				x	https://doi.org/10.1183/13993003.00688-2020	n/a
s131	Preliminary evidence that higher temperatures are associated with lower incidence of COVID-19, for cases reported globally up to 29th February 2020	2020				Weather	x		https://doi.org/10.1101/2020.03.18.20036731
s132	A Tool to Early Predict Severe 2019-Novel Coronavirus Pneumonia (COVID-19) : A Multicenter Study using the Risk Nomogram in Wuhan and Guangdong, China	2020			Age			x	https://doi.org/10.1093/cid/ciaa443	n/a
s133	Pandemic dynamics of COVID-19 using epidemic stage, instantaneous reproductive number and pathogen genome identity (GENI) score: modeling molecular epidemiology	2020				Social Factors|Weather	x		https://doi.org/10.1101/2020.03.17.20037481
s134	Roles of meteorological conditions in COVID-19 transmission on a worldwide scale	2020				Weather	x		https://doi.org/10.1101/2020.03.16.20037168
s136	SARS-CoV-2 receptor ACE2 and TMPRSS2 are predominantly expressed in a transient secretory cell type in subsegmental bronchial branches	2020					x		https://doi.org/10.1101/2020.03.13.991455	https://doi.org/10.15252/embj.20105114
s137	Clinical characteristics and durations of hospitalized patients with COVID-19 in Beijing: a retrospective cohort study	2020					x		https://doi.org/10.1101/2020.03.13.20035436
s138	Influence factors of death risk among COVID-19 patients in Wuhan, China: a hospital-based case-cohort study	2020		Underlying Health Conditions	Age		x		https://doi.org/10.1101/2020.03.13.20035329
s139	Impacts of social and economic factors on the transmission of coronavirus disease (COVID-19) in China	2020			Socioeconomic	Social Factors	x		https://doi.org/10.1101/2020.03.13.20035238
s14	Clinical features of COVID-19 in elderly patients: A comparison with young and middle-aged patients	2020			Age			x	https://doi.org/10.1016/j.jinf.2020.03.005	n/a
s140	Recommendations for standardized management of CML patients in the core epidemic area of COVID-19 (Multi-center survey results in Hubei Province, China)	2020		Underlying Health Conditions	Age		x		https://doi.org/10.1101/2020.03.12.20034876
s141	Spread of SARS-CoV-2 Coronavirus likely to be constrained by climate	2020				Weather	x		https://doi.org/10.1101/2020.03.12.20034728
s142	Impact assessment of non-pharmaceutical interventions against COVID-19 and influenza in Hong Kong: an observational study	2020				Social Factors		x	https://doi.org/10.1016/S2468-2667(20)30090-6	n/a
s143	Relationship between the ABO Blood Group and the COVID-19 Susceptibility	2020		Blood Type			x		https://doi.org/10.1101/2020.03.11.20031096
s144	Active or latent tuberculosis increases susceptibility to COVID-19 and disease severity	2020		Underlying Health Conditions			x		https://doi.org/10.1101/2020.03.10.20033795
s145	Age specificity of cases and attack rate of novel coronavirus disease (COVID-19)	2020			Age		x		https://doi.org/10.1101/2020.03.09.20033142
s146	Clinical features of imported cases of coronavirus disease 2019 in Tibetan patients in the Plateau area	2020			Age		x		https://doi.org/10.1101/2020.03.09.20033126
s147	Clinical Characteristics of SARS-CoV-2 Pneumonia Compared to Controls in Chinese Han Population	2020			Age		x		https://doi.org/10.1101/2020.03.08.20031658
s148	Clinical outcomes of 402 patients with COVID-2019 from a single center in Wuhan, China	2020			Gender|Age		x		https://doi.org/10.1101/2020.03.07.20032672	https://doi.org/10.1002/jmv.26168
s149	The epidemiological characteristics of 2019 novel coronavirus diseases (COVID-19) in Jingmen,Hubei,China	2020		Underlying Health Conditions	Gender|Age		x		https://doi.org/10.1101/2020.03.07.20031393	https://doi.org/10.1097/MD.0000000000020605
s15	Australian Government releases face masks to protect against coronavirus	2020				Social Factors		x	https://doi.org/10.1016/S2213-2600(20)30064-3	n/a
s150	Role of temperature and humidity in the modulation of the doubling time of COVID-19 cases	2020				Weather	x		https://doi.org/10.1101/2020.03.05.20031872
s151	A mathematical model for estimating the age-specific transmissibility of a novel coronavirus	2020			Age		x		https://doi.org/10.1101/2020.03.05.20031849
s152	Acute Myocardial Injury of Patients with Coronavirus Disease 2019	2020		Underlying Health Conditions			x		https://doi.org/10.1101/2020.03.05.20031591
s153	Human Kidney is a Target for Novel Severe Acute Respiratory Syndrome Coronavirus 2 (SARS-CoV-2) Infection	2020		High Blood Pressure|Underlying Health Conditions	Age		x		https://doi.org/10.1101/2020.03.04.20031120
s154	Clinical characteristics of 101 non-surviving hospitalized patients with COVID-19: A single center, retrospective study	2020		High Blood Pressure|Underlying Health Conditions	Age		x		https://doi.org/10.1101/2020.03.04.20031039
s155	Case fatality risk of novel coronavirus diseases 2019 in China	2020			Gender|Age	Infrastructure	x		https://doi.org/10.1101/2020.03.04.20031005
s156	Clinical Features of Patients Infected with the 2019 Novel Coronavirus (COVID-19) in Shanghai, China	2020		Underlying Health Conditions	Gender|Age		x		https://doi.org/10.1101/2020.03.04.20030395
s157	Modelling-based evaluation of the effect of quarantine control by the Chinese government in the coronavirus disease 2019 outbreak	2020				Social Factors	x		https://doi.org/10.1101/2020.03.03.20030445	https://doi.org/10.1007/s11427-020-1717-9
s158	Effect of non-pharmaceutical interventions for containing the COVID-19 outbreak in China	2020				Social Factors	x		https://doi.org/10.1101/2020.03.03.20029843
s159	Epidemiology and Transmission of COVID-19 in Shenzhen China: Analysis of 391 cases and 1,286 of their close contacts	2020			Age	Social Factors	x		https://doi.org/10.1101/2020.03.03.20028423	https://doi.org/10.1016/S1473-3099(20)30287-5
s16	Positive rate of RT-PCR detection of SARS-CoV-2 infection in 4880 cases from one hospital in Wuhan, China, from Jan to Feb 2020	2020			Gender|Age			x	https://doi.org/10.1016/j.cca.2020.03.009	n/a
s160	Clinical features and outcomes of 221 patients with COVID-19 in Wuhan, China	2020		Underlying Health Conditions	Age		x		https://doi.org/10.1101/2020.03.02.20030452
s161	Estimating the burden of United States workers exposed to infection or disease: a key factor in containing risk of COVID-19 infection	2020				Occupation		x	https://doi.org/10.1371/journal.pone.0232452	n/a
s162	Clinical Characteristics of Patients with Severe Pneumonia Caused by the 2019 Novel Coronavirus in Wuhan, China	2020			Age		x		https://doi.org/10.1101/2020.03.02.20029306
s163	The effect of human mobility and control measures on the COVID-19 epidemic in China	2020				Social Factors		x	https://doi.org/10.1126/science.abb4218	n/a
s164	Epidemiological and clinical features of 2019-nCoV acute respiratory disease cases in Chongqing municipality, China: a retrospective, descriptive, multiple-center study	2020		Underlying Health Conditions	Gender|Age		x		https://doi.org/10.1101/2020.03.01.20029397
s165	Epidemiological and clinical features of COVID-19 patients with and without pneumonia in Beijing, China	2020		High Blood Pressure	Age		x		https://doi.org/10.1101/2020.02.28.20028068
s166	Clinical characteristics of 36 non-survivors with COVID-19 in Wuhan, China	2020		High Blood Pressure|Underlying Health Conditions	Gender|Age		x		https://doi.org/10.1101/2020.02.27.20029009
s167	Sex differences in clinical findings among patients with coronavirus disease 2019 (COVID-19) and severe condition	2020			Gender		x		https://doi.org/10.1101/2020.02.27.20027524
s168	Heart injury signs are associated with higher and earlier mortality in coronavirus disease 2019 (COVID-19)	2020	Addiction	High Blood Pressure|Underlying Health Conditions	Gender|Age		x		https://doi.org/10.1101/2020.02.26.20028589
s169	The Effects of "Fangcang, Huoshenshan, and Leishenshan" Makeshift Hospitals and Temperature on the Mortality of COVID-19	2020				Infrastructure|Weather	x		https://doi.org/10.1101/2020.02.26.20028472
s17	Clinical course and risk factors for mortality of adult inpatients with COVID-19 in Wuhan, China: a retrospective cohort study	2020			Age		x		https://doi.org/10.1016/S0140-6736(20)30566-3
s170	Clinical characteristics of 82 death cases with COVID-19	2020		High Blood Pressure|Underlying Health Conditions	Gender|Age		x		https://doi.org/10.1101/2020.02.26.20028191
s171	Evaluation of the clinical characteristics of suspected or confirmed cases of COVID-19 during home care with isolation: A new retrospective analysis based on O2O	2020			Age		x		https://doi.org/10.1101/2020.02.26.20028084
s172	Age-dependent risks of Incidence and Mortality of COVID-19 in Hubei Province and Other Parts of China	2020			Age			x	https://doi.org/10.3389/fmed.2020.00190	n/a
s173	Comorbidity and its impact on 1,590 patients with COVID-19 in China: A Nationwide Analysis	2020		High Blood Pressure|Underlying Health Conditions		Social Factors		x	https://doi.org/10.1183/13993003.00547-2020	n/a
s174	Correlation Analysis Between Disease Severity and Inflammation-related Parameters in Patients with COVID-19 Pneumonia	2020			Age		x		https://doi.org/10.1101/2020.02.25.20025643
s175	Highland of COVID-19 outside Hubei: epidemic characteristics, control and projections of Wenzhou, China	2020				Social Factors	x		https://doi.org/10.1101/2020.02.25.20024398
s176	Estimation of risk factors for COVID-19 mortality - preliminary results	2020		Underlying Health Conditions	Gender|Age		x		https://doi.org/10.1101/2020.02.24.20027268
s177	Clinical and radiographic features of cardiac injury in patients with 2019 novel coronavirus pneumonia	2020		Underlying Health Conditions			x		https://doi.org/10.1101/2020.02.24.20027052
s178	Clinical features and laboratory inspection of novel coronavirus pneumonia (COVID-19) in Xiangyang, Hubei	2020			Age		x		https://doi.org/10.1101/2020.02.23.20026963
s179	Gender differences in patients with COVID-19: Focus on severity and mortality	2020		Underlying Health Conditions	Gender|Age			x	https://doi.org/10.3389/fpubh.2020.00152	n/a
s18	The association between domestic train transportation and novel coronavirus (2019-nCoV) outbreak in China from 2019 to 2020: A data-driven correlational report	2020				Social Factors		x	https://doi.org/10.1016/j.tmaid.2020.101568	n/a
s180	Neurological Manifestations of Hospitalized Patients with COVID-19 in Wuhan, China: a retrospective case series study	2020		High Blood Pressure|Underlying Health Conditions	Age		x		https://doi.org/10.1101/2020.02.22.20026500
s181	Temperature significant change COVID-19 Transmission in 429 cities	2020				Weather	x		https://doi.org/10.1101/2020.02.22.20025791
s182	SARS-CoV-2 transmission in cancer patients of a tertiary hospital in Wuhan	2020		Underlying Health Conditions		Social Factors	x		https://doi.org/10.1101/2020.02.22.20025320
s184	Clinical characteristics of 51 patients discharged from hospital with COVID-19 in Chongqing, China	2020		Underlying Health Conditions	Age	Social Factors	x		https://doi.org/10.1101/2020.02.20.20025536
s185	ACP risk grade: a simple mortality index for patients with confirmed or suspected severe acute respiratory syndrome coronavirus 2 disease (COVID-19) during the early stage of outbreak in Wuhan, China	2020			Gender|Age		x		https://doi.org/10.1101/2020.02.20.20025510
s187	Clinical characteristics of 25 death cases infected with COVID-19 pneumonia: a retrospective review of medical records in a single medical center, Wuhan, China	2020	Nutrition and Diet	High Blood Pressure|Underlying Health Conditions	Age			x	https://doi.org/10.1016/j.ijid.2020.03.053	n/a
s188	The cross-sectional study of hospitalized coronavirus disease 2019 patients in Xiangyang, Hubei province	2020			Age	Social Factors	x		https://doi.org/10.1101/2020.02.19.20025023
s189	Kidney impairment is associated with in-hospital death of COVID-19 patients	2020					x		https://doi.org/10.1101/2020.02.18.20023242
s19	Potential Factors Influencing Repeated SARS Outbreaks in China	2020				Social Factors|Weather		x	https://doi.org/10.3390/ijerph17051633	n/a
s190	Association between 2019-nCoV transmission and N95 respirator use	2020				Occupation|Social Factors		x	https://doi.org/10.1016/j.jhin.2020.02.021	n/a
s191	Clinical features and progression of acute respiratory distress syndrome in coronavirus disease 2019	2020		Underlying Health Conditions	Age		x		https://doi.org/10.1101/2020.02.17.20024166
s192	COVID-19 in a Designated Infectious Diseases Hospital Outside Hubei Province, China	2020		Underlying Health Conditions	Age			x	https://doi.org/10.1111/all.14309	n/a
s193	Profiling ACE2 expression in colon tissue of healthy adults and colorectal cancer patients by single-cell transcriptome analysis	2020		Underlying Health Conditions			x		https://doi.org/10.1101/2020.02.15.20023457
s194	Analysis of meteorological conditions and prediction of epidemic trend of 2019-nCoV infection in 2020	2020				Social Factors|Weather	x		https://doi.org/10.1101/2020.02.13.20022715
s195	The role of absolute humidity on transmission rates of the COVID-19 outbreak	2020				Weather	x		https://doi.org/10.1101/2020.02.12.20022467
s196	Epidemiological and Clinical Characteristics of 17 Hospitalized Patients with 2019 Novel Coronavirus Infections Outside Wuhan, China	2020			Age		x		https://doi.org/10.1101/2020.02.11.20022053
s197	Neutrophil-to-Lymphocyte Ratio Predicts Severe Illness Patients with 2019 Novel Coronavirus in the Early Stage	2020			Age		x		https://doi.org/10.1101/2020.02.10.20021584
s198	Population movement, city closure and spatial transmission of the 2019-nCoV infection in China	2020				Social Factors	x		https://doi.org/10.1101/2020.02.04.20020339
s199	Evidence and characteristics of human-to-human transmission of SARS-CoV-2	2020				Social Factors	x		https://doi.org/10.1101/2020.02.03.20019141
s2	Asymptomatic carrier state, acute respiratory disease, and pneumonia due to severe acute respiratory syndrome coronavirus 2 (SARSCoV-2): Facts and myths	2020		Underlying Health Conditions	Age	Occupation		x	https://doi.org/10.1016/j.jmii.2020.02.012	n/a
s20	Active smoking is not associated with severity of coronavirus disease 2019 (COVID-19)	2020	Addiction					x	https://doi.org/10.1016/j.ejim.2020.03.014	n/a
s200	The impact of transmission control measures during the first 50 days of the COVID-19 epidemic in China	2020				Social Factors	x		https://doi.org/10.1101/2020.01.30.20019844	https://doi.org/10.1126/science.abb6105
s201	Single-cell RNA expression profiling of ACE2, the putative receptor of Wuhan 2019-nCov	2020		Genetic	Gender		x		https://doi.org/10.1101/2020.01.26.919985	https://doi.org/10.1164/rccm.202001-0179LE
s202	Familial cluster of COVID-19 infection from an asymptomatic	2020				Social Factors		x	https://doi.org/10.1186/s13054-020-2817-7	n/a
s203	Analysis of clinical characteristics and laboratory findings of 95 cases of 2019 novel coronavirus pneumonia in Wuhan, China: a retrospective analysis	2020			Gender|Age			x	https://doi.org/10.1186/s12931-020-01338-8	n/a
s204	Knowledge, attitudes, and practices towards COVID-19 among Chinese residents during the rapid rise period of the COVID-19 outbreak: a quick online cross-sectional survey	2020			Gender|Socioeconomic	Social Factors		x	https://doi.org/10.7150/ijbs.45221	n/a
s205	Evaluation of SARS-CoV-2 RNA shedding in clinical specimens and clinical characteristics of 10 patients with COVID-19 in Macau	2020			Age			x	https://doi.org/10.7150/ijbs.45357	n/a
s206	Association of radiologic findings with mortality of patients infected with 2019 novel coronavirus in Wuhan, China	2020		Underlying Health Conditions	Age			x	https://doi.org/10.1371/journal.pone.0230548	n/a
s207	Lower mortality of COVID-19 by early recognition and intervention: experience from Jiangsu Province	2020						x	https://doi.org/10.1186/s13613-020-00650-2	n/a
s21	Epidemiological and clinical characteristics of 99 cases of 2019 novel coronavirus pneumonia in Wuhan, China: a descriptive study	2020		Underlying Health Conditions	Gender|Age	Social Factors		x	https://doi.org/10.1016/S0140-6736(20)30211-7	n/a
s210	Can early and high intravenous dose of vitamin C prevent and treat coronavirus disease 2019 (COVID-19)?	2020						x	https://doi.org/10.1016/j.medidd.2020.100028	n/a
s211	Prevention of SARS-CoV-2 infection in patients with decompensated cirrhosis	2020						x	https://doi.org/10.1016/S2468-1253(20)30080-7	n/a
s212	Canada needs to rapidly escalate public health interventions for its COVID-19 mitigation strategies	2020				Social Factors		x	https://doi.org/10.1016/j.idm.2020.03.004	n/a
s213	Use of antiviral drugs to reduce COVID-19 transmission	2020	Medication					x	https://doi.org/10.1016/S2214-109X(20)30114-5	n/a
s214	Rational use of face masks in the COVID-19 pandemic	2020				Social Factors|Infrastructure		x	https://doi.org/10.1016/S2213-2600(20)30134-X	n/a
s215	COVID-19 in patients with cardiovascular diseases	2020		Underlying Health Conditions				x	https://doi.org/10.1016/j.acvd.2020.03.009	n/a
s216	COVID 19 in INDIA: Strategies to combat from combination threat of life and livelihood	2020		Underlying Health Conditions	Socioeconomic|Age	Social Factors|Infrastructure|Living Conditions		x	https://doi.org/10.1016/j.jmii.2020.03.024	n/a
s217	The Battle Against Coronavirus Disease 2019 (COVID-19): Emergency Management and Infection Control in a Radiology Department	2020				Social Factors|Occupation|Infrastructure		x	https://doi.org/10.1016/j.jacr.2020.03.011	n/a
s218	Long-Term Care Facilities and the Coronavirus Epidemic: Practical Guidelines for a Population at Highest Risk	2020						x	https://doi.org/10.1016/j.jamda.2020.03.004	n/a
s219	Estimates of the severity of coronavirus disease 2019: a model-based analysis	2020			Age			x	https://doi.org/10.1016/S1473-3099(20)30243-7	n/a
s22	Are patients with hypertension and diabetes mellitus at increased risk for COVID-19 infection?	2020	Medication	High Blood Pressure|Underlying Health Conditions				x	https://doi.org/10.1016/S2213-2600(20)30116-8	n/a
s220	Transmission potential and severity of COVID-19 in South Korea	2020			Gender|Age	Social Factors		x	https://doi.org/10.1016/j.ijid.2020.03.031	n/a
s221	Impact of Nutrition and Diet on COVID-19 Infection and Implications for Kidney Health and Kidney Disease Management	2020		Underlying Health Conditions				x	https://doi.org/10.1053/j.jrn.2020.03.006	n/a
s222	Chronic obstructive pulmonary disease is associated with severe coronavirus disease 2019 (COVID-19)	2020		Underlying Health Conditions				x	https://doi.org/10.1016/j.rmed.2020.105941	n/a
s223	COVID-19 Infection in Cancer Patients: Early Observations and Unanswered Questions	2020		Underlying Health Conditions				x	https://doi.org/10.1016/j.annonc.2020.03.297	n/a
s224	Clinical characteristics of COVID-19-infected cancer patients: A retrospective case study in three hospitals within Wuhan, China	2020	Medication	Underlying Health Conditions				x	https://doi.org/10.1016/j.annonc.2020.03.296	n/a
s225	One size does not fit all – Patterns of vulnerability and resilience in the COVID-19 pandemic and why heterogeneity of disease matters	2020						x	https://doi.org/10.1016/j.bbi.2020.03.016	n/a
s227	Age, diabetes and heart disease linked to risk of death	2020		Underlying Health Conditions	Age			x	https://doi.org/10.1016/S0262-4079(20)30523-6	n/a
s228	Beyond the assistance: additional exposure situations to COVID-19 for healthcare workers	2020				Occupation		x	https://doi.org/10.1016/j.jhin.2020.03.033	n/a
s229	Why are pregnant women susceptible to COVID-19? An immunological viewpoint	2020		Pregnancy				x	https://doi.org/10.1016/j.jri.2020.103122	n/a
s23	COVID-19 and the Risk to Health Care Workers: A Case Report	2020				Occupation|Infrastructure		x	https://doi.org/10.7326/L20-0175	n/a
s230	Coronavirus Disease 2019 in elderly patients: characteristics and prognostic factors based on 4-week follow-up	2020		Underlying Health Conditions	Age			x	https://doi.org/10.1016/j.jinf.2020.03.019	n/a
s231	Refugee and migrant health in the COVID-19 response	2020				Infrastructure|Living Conditions		x	https://doi.org/10.1016/S0140-6736(20)30791-1	n/a
s232	No time for dilemma: mass gatherings must be suspended	2020				Social Factors		x	https://doi.org/10.1016/S0140-6736(20)30754-6	n/a
s233	Mass gathering events and reducing further global spread of COVID-19: a political and public health dilemma	2020				Social Factors		x	https://doi.org/10.1016/S0140-6736(20)30681-4	n/a
s234	Kidney disease is associated with in-hospital death of patients with COVID-19	2020		Underlying Health Conditions				x	https://doi.org/10.1016/j.kint.2020.03.005	n/a
s235	Effects of temperature variation and humidity on the death of COVID-19 in Wuhan, China	2020				Weather	x		https://doi.org/10.1101/2020.03.15.20036426
s236	Association between ambient temperature and COVID-19 infection in 122 cities from China	2020				Weather		x	https://doi.org/10.1016/j.scitotenv.2020.138201	n/a
s24	COVID-19 control in China during mass population movements at New Year	2020				Social Factors		x	https://doi.org/10.1016/S0140-6736(20)30421-9	n/a
s25	Transmission of COVID-19 in the terminal stage of incubation period: a familial cluster	2020				Social Factors		x	https://doi.org/10.1016/j.ijid.2020.03.027	n/a
s26	Risk of COVID-19 for patients with cancer	2020		Underlying Health Conditions	Age			x	https://doi.org/10.1016/S1470-2045(20)30150-9	n/a
s3	Clinical and CT imaging features of the COVID-19 pneumonia: Focus on pregnant women and children	2020		Pregnancy				x	https://doi.org/10.1016/j.jinf.2020.03.007	n/a
s30	Influenza-associated pneumonia as reference to assess seriousness of coronavirus disease (COVID-19)	2020		Underlying Health Conditions				x	https://doi.org/10.2807/1560-7917.ES.2020.25.11.2000258	n/a
s31	Epidemiological and Clinical Characteristics of 99 Cases of 2019-Novel Coronavirus (2019-nCoV) Pneumonia in Wuhan, China							x	https://doi.org/10.1016/S0140-6736(20)30211-7	n/a
s32	Limiting spread of COVID-19 from cruise ships - lessons to be learnt from Japan	2020				Social Factors|Infrastructure|Living Conditions		x	https://doi.org/10.1093/qjmed/hcaa092	n/a
s33	Management scheme for infection control and radiological protection in diagnostic radiology examination of novel coronavirus pneumonia	2020				Occupation|Infrastructure		x	https://doi.org/10.1016/j.radmp.2020.05.005	n/a
s34	Expert recommendations for diabetes with or without COVID-19 management in communities	2020		Underlying Health Conditions				x	WHO COVID Database ID: covidwho-6048 (https://pesquisa.bvsalud.org/global-literature-on-novel-coronavirus-2019-ncov/resource/en/covidwho-6048)	n/a
s35	Epidemiological analysis on a family cluster of COVID-19	2020				Social Factors		x	https://doi.org/10.1016/j.jinf.2020.04.018	n/a
s36	Manifestations of Digestive system in hospitalized patients with novel coronavirus pneumonia in Wuhan, China: a single-center, descriptive study	2020		Underlying Health Conditions	Gender|Age			x	WHO COVID Database ID: covidwho-2296 (https://pesquisa.bvsalud.org/global-literature-on-novel-coronavirus-2019-ncov/resource/en/covidwho-2296)	n/a
s37	Clinical features of 2019 novel coronavirus infection patients and a feasible screening procedure	2020						x	https://doi.org/10.1016/S0140-6736(20)30183-5	n/a
s38	Current situation and trend of coronavirus diseases 2019 (COVID-2019) in foreign countries	2020		Underlying Health Conditions	Gender|Age			x	WHO COVID Database ID: covidwho-6281 (https://pesquisa.bvsalud.org/global-literature-on-novel-coronavirus-2019-ncov/resource/en/covidwho-6281)	n/a
s39	Study on the relationship between the 2019 Novel Coronavirus Disease epidemic in China and population migration from Wuhan	2020						x	WHO COVID Database ID: covidwho-60018 (https://pesquisa.bvsalud.org/global-literature-on-novel-coronavirus-2019-ncov/resource/en/covidwho-60018)	n/a
s4	The neglected health of international migrant workers in the COVID-19 epidemic	2020				Occupation		x	https://doi.org/10.1016/S2215-0366(20)30076-6	n/a
s40	Early clinical manifestations and pulmonary imaging analysis of patients with Novel coronavirus pneumonia	2020			Age			x	WHO COVID Database ID: covidwho-2090 (https://pesquisa.bvsalud.org/global-literature-on-novel-coronavirus-2019-ncov/resource/en/covidwho-2090)	n/a
s41	Comparison of heart failure and 2019 novel coronavirus pneumonia in chest CT features and clinical characteristics	2020		Underlying Health Conditions				x	https://doi.org/10.3760/cma.j.cn112148-20200218-00093	n/a
s42	Analysis of family cluster infection with Novel Coronavirus Pneumonia	2020				Social Factors		x	https://doi.org/10.3760/cma.j.issn.0253-9624.2020.0005	n/a
s43	Clinical characteristics and outcomes of 112 cardiovascular disease patients infected by 2019-nCoV	2020		Underlying Health Conditions|Body Weight				x	https://doi.org/10.3760/cma.j.cn112148-20200220-00105	n/a
s44	Analysis of clinical features of 153 patients with novel coronavirus pneumonia in Chongqing	2020		Underlying Health Conditions				x	https://doi.org/10.3760/CMA.J.CN115673-20200212-00030	n/a
s45	Clinical characteristics of refractory COVID-19 pneumonia in Wuhan, China	2020		Underlying Health Conditions	Gender|Age			x	https://doi.org/10.1093/cid/ciaa270	n/a
s46	Clinical Management of Lung Cancer Patients during the Outbreak of 2019 Novel Coronavirus Disease (COVID-19)	2020	Medication	Underlying Health Conditions				x	https://doi.org/10.3779/j.issn.1009-3419.2020.03.02	n/a
s47	Preliminary study of the relationship between novel coronavirus pneumonia and liver function damage: a multicenter study	2020		Underlying Health Conditions				x	https://doi.org/10.3760/cma.j.issn.1007-3418.2020.02.003	n/a
s48	Early detection and disease assessment of patients with novel coronavirus pneumonia	2020		Underlying Health Conditions	Age			x	https://doi.org/10.3760/cma.j.issn.1001-0939.2020.0003	n/a
s49	The preliminary analysis on the characteristics of the cluster for the Corona Virus Disease	2020			Age	Social Factors		x	https://doi.org/10.3760/cma.j.cn112338-20200223-00153	n/a
s50	[Epidemiological analysis on a family cluster of COVID-19]	2020				Social Factors		x	https://doi.org/10.3760/cma.j.cn112338-20200221-00147	n/a
s51	Epidemiological characteristics of confirmed COVID-19 cases in Tianjin	2020		Underlying Health Conditions	Age	Social Factors		x	https://doi.org/10.3760/cma.j.cn112338-20200221-00146	n/a
s52	Impact of complicated myocardial injury on the clinical outcome of severe or critically ill COVID-19 patients	2020		Underlying Health Conditions				x	https://doi.org/10.3760/cma.j.cn112148-20200228-00137	n/a
s53	[Analysis of myocardial injury in patients with COVID-19 and association between concomitant cardiovascular diseases and severity of COVID-19]	2020		High Blood Pressure|Underlying Health Conditions	Gender|Age			x	https://doi.org/10.3760/cma.j.cn112148-20200225-00123	n/a
s56	Epidemiological characteristics of novel coronavirus pneumonia in Henan	2020		Underlying Health Conditions	Gender|Age	Social Factors		x	https://doi.org/10.3760/cma.j.cn112147-20200222-00148	n/a
s57	The differential diagnosis for novel coronavirus pneumonia and similar lung diseases in general hospitals	2020						x	https://doi.org/10.3760/cma.j.cn112147-20200221-00136	n/a
s58	[Treatment of pancreatic diseases and prevention of infection during outbreak of 2019 coronavirus disease]	2020				Occupation		x	https://doi.org/10.3760/cma.j.cn112139-20200224-00123	n/a
s59	Relation Between Chest CT Findings and Clinical Conditions of Coronavirus Disease (COVID-19) Pneumonia: A Multicenter Study	2020			Age			x	https://doi.org/10.2214/AJR.20.22976	n/a
s6	Clinical course and outcomes of critically ill patients with SARS-CoV-2 pneumonia in Wuhan, China: a single-centered, retrospective, observational study	2020		Underlying Health Conditions	Age			x	https://doi.org/10.1016/S2213-2600(20)30079-5	n/a
s60	COVID-19 Presents High Risk to Older Persons	2020			Age			x	https://doi.org/10.1111/jgs.16426	n/a
s62	Clinical characteristics of 140 patients infected by SARS-CoV-2 in Wuhan, China	2020		Underlying Health Conditions	Age			x	https://doi.org/10.1111/all.14238	n/a
s63	The Clinical and Chest CT Features Associated with Severe and Critical COVID-19 Pneumonia	2020		Underlying Health Conditions	Age			x	https://doi.org/10.1097/RLI.0000000000000672	n/a
s64	Clinical Features of 69 Cases with Coronavirus Disease 2019 in Wuhan, China	2020		Underlying Health Conditions	Age			x	https://doi.org/doi: 10.1093/cid/ciaa272	n/a
s65	Clinical characteristics of refractory COVID-19 pneumonia in Wuhan, China	2020		Underlying Health Conditions	Gender|Age			x	https://doi.org/10.1093/cid/ciaa270	n/a
s66	A Case Series of children with 2019 novel coronavirus infection: clinical and epidemiological features	2020			Age			x	https://doi.org/10.1093/cid/ciaa198	n/a
s68	Covid-19 — Navigating the Uncharted	2020		Underlying Health Conditions	Age			x	https://doi.org/10.1056/NEJMe2002387	n/a
s69	Clinical features of pediatric patients with COVID-19: a report of two family cluster cases	2020			Age	Social Factors		x	https://doi.org/10.1007/s12519-020-00356-2	n/a
s7	Lessons learned from the 2019-nCoV epidemic on prevention of future infectious diseases	2020				Social Factors		x	https://doi.org/10.1016/j.micinf.2020.02.004	n/a
s70	Clinical features and short-term outcomes of 18 patients with corona virus disease 2019 in intensive care unit	2020						x	https://doi.org/10.1007/s00134-020-05987-7	n/a
s72	Initial clinical features of suspected Coronavirus Disease 2019 in two emergency departments outside of Hubei, China	2020			Age			x	https://doi.org/10.1002/jmv.25763	n/a
s73	Updated understanding of the outbreak of 2019 novel coronavirus (2019?nCoV) in Wuhan, China	2020			Age			x	https://doi.org/10.1002/jmv.25689	n/a
s74	Risk Factors Associated With Acute Respiratory Distress Syndrome and Death in Patients With Coronavirus Disease 2019 Pneumonia in Wuhan, China	2020		High Blood Pressure|Underlying Health Conditions	Age			x	https://doi.org/10.1001/jamainternmed.2020.0994	n/a
s75	Response to COVID-19 in Taiwan: Big Data Analytics, New Technology, and Proactive Testing	2020				Social Factors|Infrastructure		x	https://doi.org/10.1001/jama.2020.3151	n/a
s76	Clinical Characteristics of 138 Hospitalized Patients With 2019 Novel Coronavirus-Infected Pneumonia in Wuhan, China	2020		Underlying Health Conditions	Age	Occupation		x	https://doi.org/10.1001/jama.2020.1585	n/a
s78	Clinical characteristics of novel coronavirus cases in tertiary hospitals in Hubei Province	2020		Underlying Health Conditions	Age			x	https://doi.org/10.1097/CM9.0000000000000744	n/a
s79	Analysis of factors associated with disease outcomes in hospitalized patients with 2019 novel coronavirus disease	2020	Addiction		Age			x	https://doi.org/10.1097/CM9.0000000000000775	n/a
s8	Integrated infection control strategy to minimize nosocomial infection of corona virus disease 2019 among ENT healthcare workers	2020						x	https://doi.org/10.1016/j.jhin.2020.02.018	n/a
s80	Quantifying the association between domestic travel and the exportation of novel coronavirus (2019-nCoV) cases from Wuhan, China in 2020: A correlational analysis	2020				Social Factors		x	https://doi.org/10.1093/jtm/taaa022	n/a
s81	The Institutional and Cultural Context of Cross-National Variation in COVID-19 Outbreaks	2020			Socioeconomic|Age	Social Factors|Infrastructure	x		https://doi.org/10.1101/2020.03.30.20047589
s82	COVID-19 transmission in Mainland China is associated with temperature and humidity: a time-series analysis	2020				Weather	x		https://doi.org/10.1101/2020.03.30.20044099	https://doi.org/10.1016/j.scitotenv.2020.138778
s83	Eco-epidemiological assessment of the COVID-19 epidemic in China, January-February 2020	2020				Weather	x		https://doi.org/10.1101/2020.03.29.20046565	https://doi.org/10.1080/16549716.2020.1760490
s84	How to evaluate the success of the COVID-19 measures implemented by the Norwegian government by analyzing changes in doubling time	2020				Social Factors	x		https://doi.org/10.1101/2020.03.29.20045187
s85	Which Measures are Effective in Containing COVID-19? Empirical Research Based on Prevention and Control Cases in China	2020			Socioeconomic	Social Factors	x		https://doi.org/10.1101/2020.03.28.20046110
s86	Prognostic factors for COVID-19 pneumonia progression to severe symptom based on the earlier clinical features: a retrospective analysis	2020		Underlying Health Conditions			x		https://doi.org/10.1101/2020.03.28.20045989
s87	Temperature, humidity, and wind speed are associated with lower Covid-19 incidence	2020				Weather	x		https://doi.org/10.1101/2020.03.27.20045658
s88	Research on the Influence of Effective Distance Between Cities on the Cross-regional Transmission of COVID-19	2020				Infrastructure|Social Factors	x		https://doi.org/10.1101/2020.03.27.20044958
s89	Clinical characteristics associated with COVID-19 severity in California	2020		High Blood Pressure|Underlying Health Conditions			x		https://doi.org/10.1101/2020.03.27.20043661	https://doi.org/10.1017/cts.2020.40
s9	How African migrants in China cope with barriers to health care	2020				Infrastructure		x	https://doi.org/10.1016/S2468-2667(20)30048-7	n/a
s90	Climate effect on COVID-19 spread rate: an online surveillance tool	2020				Weather	x		https://doi.org/10.1101/2020.03.26.20044727
s91	Temperature dependence of COVID-19 transmission	2020				Social Factors|Weather	x		https://doi.org/10.1101/2020.03.26.20044529
s92	Early Spread of SARS-Cov-2 in the Icelandic Population	2020			Gender|Age		x		https://doi.org/10.1101/2020.03.26.20044446
s93	Causal empirical estimates suggest COVID-19 transmission rates are highly seasonal	2020				Weather	x		https://doi.org/10.1101/2020.03.26.20044420
s94	A single holiday was the turning point of the COVID-19 policy of Israel	2020				Social Factors	x		https://doi.org/10.1101/2020.03.26.20044412
s95	A Multi-hospital Study in Wuhan, China: Protective Effects of Non-menopause and Female Hormones on SARS-CoV-2 infection	2020		Hormones			x		https://doi.org/10.1101/2020.03.26.20043943
s96	A comparison study of SARS-CoV-2 IgG antibody between male and female COVID-19 patients: a possible reason underlying different outcome between gender.	2020			Gender		x		https://doi.org/10.1101/2020.03.26.20040709	https://doi.org/10.1002/jmv.25989
s97	A Machine Learning Model Reveals Older Age and Delayed Hospitalization as Predictors of Mortality in Patients with COVID-19	2020			Age		x		https://doi.org/10.1101/2020.03.25.20043331
s98	Risk assessment of progression to severe conditions for patients with COVID-19 pneumonia: a single-center retrospective study	2020		High Blood Pressure|Underlying Health Conditions|Body Weight	Age		x		https://doi.org/10.1101/2020.03.25.20043166
s99	Risk Factors Associated with Clinical Outcomes in 323 COVID-19 Patients in Wuhan, China	2020	Addiction	Underlying Health Conditions	Age		x		https://doi.org/10.1101/2020.03.25.20037721
